# Supplementary material
Source: PubMed Central journal article supplement (PMC10031385)
Supplement: jama-e230488-s001.pdf [file jama-e230488-s001.pdf]

## Data Sharing Statement

### Data

**Data available:** No

### Additional Information

**Explanation for why data not available:** American Hospital Association survey data is available under license from AHA (<https://www.ahadata.com/>). Requests for hospital religious affiliations collected by Community Catalyst should be directed to [info@communitycatalyst.org](mailto:info@communitycatalyst.org) and those maintained by the Catholic Hospital Association are available at <https://www.chausa.org/for-members/directories/catholic-health-care-directory>.
